# Supplementary material for: An Efficient, Short Stimulus PANC-1 Cancer Cell Ablation and Electrothermal Therapy Driven by Hydrophobic Interactions
Source: MDPI journal article supplement (doi:10.3390/pharmaceutics15010106), 2022-12-28
Supplement: s1 [file s1]

## Supporting Information

### **An efficient, short stimulus PANC-1 cancer cell ablation and electrothermal therapy driven by hydrophobic interactions**

Maria Prisca Meivita,<sup>1</sup> Denise Lee,<sup>1</sup> J Shamita Naikar,<sup>1,2</sup> Shao Xiang Go,<sup>1</sup> Wey Chyi Teoh,<sup>2,3</sup>  
Yaw Sing Tan,<sup>4</sup> Natasa Bajalovic,<sup>1</sup> Desmond K. Loke,<sup>1,2</sup>

<sup>1</sup>*Department of Science, Mathematics and Technology, Singapore University of Technology and Design,  
Singapore 487372, Singapore*

<sup>2</sup>*Office of Innovation, <sup>3</sup>Department of Radiology, Changi General Hospital, Singapore 529889, Singapore*

<sup>4</sup>*Bioinformatics Institute, Agency for Science, Technology and Research (A\*STAR), Singapore 138671,  
Singapore*

*Correspondence and requests for material should be addressed to N.B. (e-mail:  
natasa\_bajalovic@sutd.edu.sg) or D.K.L (e-mail: desmond\_loke@sutd.edu.sg).*

**Table S1.** Thermoelectric properties of the cell layer/ nanostructure model utilized in electrothermal simulations.

| Material         | Isotropic thermal conductivity (W/mK) | Isotropic resistivity ( $\Omega$ cm) |
|------------------|---------------------------------------|--------------------------------------|
| SiO <sub>2</sub> | 1.4                                   | 10 <sup>16</sup>                     |
| ITO              | 4                                     | 0.0001                               |
| PEG/ M13         | 0.2                                   | 0.1                                  |
| Cell in DMEM     | 0.63                                  | 97.66                                |
| MoS <sub>2</sub> | 0.26                                  | 29                                   |

**Table S2.** Components of the computed binding free energy (kcal/mol) for the interaction of the G3P with PD-L1<sup>a</sup>

| System    | $\Delta E_{\text{ele}}$ | $\Delta E_{\text{vdw}}$ | $\Delta E_{\text{PBSUR}}$ | $\Delta E_{\text{PBCAL}}$ | $\Delta H_{\text{bind}}$ | $T\Delta S$       | $\Delta G_{\text{bind}}$ |
|-----------|-------------------------|-------------------------|---------------------------|---------------------------|--------------------------|-------------------|--------------------------|
| G3P-PD-L1 | -2.56 $\pm$ 20.43       | -80.35 $\pm$ 9.91       | -10.47 $\pm$ 0.70         | 20.86 $\pm$ 17.50         | -72.50 $\pm$ 5.78        | -44.06 $\pm$ 2.67 | -28.44 $\pm$ 6.89        |

<sup>a</sup> $\Delta E_{\text{ele}}$ , electrostatic potential energy;  $\Delta E_{\text{vdw}}$ , van der Waals potential energy;  $\Delta E_{\text{PBSUR}}$ , nonpolar contribution to solvation free energy;  $\Delta E_{\text{PBCAL}}$ , polar contribution to solvation free energy;  $\Delta H_{\text{bind}} = \Delta E_{\text{ele}} + \Delta E_{\text{vdw}} + \Delta E_{\text{PBSUR}} + \Delta E_{\text{PBCAL}}$ , enthalpy of binding;  $T\Delta S$ , sum of vibrational, rotational and translational entropic contributions;  $\Delta G_{\text{bind}} = \Delta H_{\text{bind}} - T\Delta S$ , free energy of binding.

**Table S3.** References for Figure S1.

| Ref No. | Reference                                                                                                                                                                                                                                                                                                                                                                             | Type of interactions   |
|---------|---------------------------------------------------------------------------------------------------------------------------------------------------------------------------------------------------------------------------------------------------------------------------------------------------------------------------------------------------------------------------------------|------------------------|
| 1       | Joseph, T. L.; Madhumalar, A.; Brown, C. J.; Lane, D. P.; Verma, C. S. Differential Binding of P53 and Nutlin to MDM2 and MDMX: Computational Studies. <i>Cell Cycle</i> <b>2010</b> , 9 (6), 1167–1181. <a href="https://doi.org/10.4161/cc.9.6.11067">https://doi.org/10.4161/cc.9.6.11067</a> .                                                                                    | MDM2 and p53           |
| 2       | Zhang, D.; Jia, H.; Wang, Y.; Li, W.-M.; Hou, Y.-C.; Yin, S.-W.; Wang, T. D.; He, S.-X.; Lu, S.-Y. A CD44 Specific Peptide Developed by Phage Display for Targeting Gastric Cancer. <i>Biotechnol Lett</i> <b>2015</b> , 37 (11), 2311–2320. <a href="https://doi.org/10.1007/s10529-015-1896-z">https://doi.org/10.1007/s10529-015-1896-z</a> .                                      | RP-1 peptide and CD44  |
| 3       | Oo, K. K.; Kamolhan, T.; Soni, A.; Thongchot, S.; Mitrpant, C.; O-charoenrat, P.; Thuwajit, C.; Thuwajit, P. Development of an Engineered Peptide Antagonist against Periostin to Overcome Doxorubicin Resistance in Breast Cancer. <i>BMC Cancer</i> <b>2021</b> , 21 (1), 65. <a href="https://doi.org/10.1186/s12885-020-07761-w">https://doi.org/10.1186/s12885-020-07761-w</a> . | anti-PN peptide and PN |

**Table S4.** References for Figure S6.

| Ref No. | Reference                                                                                                                                                                                                                                                                                                                                                                                                                                                                                                                          |
|---------|------------------------------------------------------------------------------------------------------------------------------------------------------------------------------------------------------------------------------------------------------------------------------------------------------------------------------------------------------------------------------------------------------------------------------------------------------------------------------------------------------------------------------------|
| 1       | Han, X.; Deng, Z.; Yang, Z.; Wang, Y.; Zhu, H.; Chen, B.; Cui, Z.; Ewing, R. C.; Shi, D. Biomarkerless Targeting and Photothermal Cancer Cell Killing by Surface-Electrically-Charged Superparamagnetic Fe <sub>3</sub> O <sub>4</sub> Composite Nanoparticles. <i>Nanoscale</i> <b>2017</b> , 9 (4), 1457–1465. <a href="https://doi.org/10.1039/C6NR07161A">https://doi.org/10.1039/C6NR07161A</a> .                                                                                                                             |
| 2       | Mantso, T.; Vasileiadis, S.; Anastopoulos, I.; Voulgaridou, G. P.; Lampri, E.; Botaitis, S.; Kontomanolis, E. N.; Simopoulos, C.; Goussetis, G.; Franco, R.; Chlichlia, K.; Pappa, A.; Panayiotidis, M. I. Hyperthermia Induces Therapeutic Effectiveness and Potentiates Adjuvant Therapy with Non-Targeted and Targeted Drugs in an in Vitro Model of Human Malignant Melanoma. <i>Sci Rep</i> <b>2018</b> , 8 (1), 10724. <a href="https://doi.org/10.1038/s41598-018-29018-0">https://doi.org/10.1038/s41598-018-29018-0</a> . |

**Table S5.** References for Figure S7.

| Ref No. | Reference                                                                                                                                                                                                                                                                                                                                                                                               | Type of nanostructure |
|---------|---------------------------------------------------------------------------------------------------------------------------------------------------------------------------------------------------------------------------------------------------------------------------------------------------------------------------------------------------------------------------------------------------------|-----------------------|
| 1       | Kurapati, R.; Muzi, L.; de Garibay, A. P. R.; Russier, J.; Voiry, D.; Vacchi, I. A.; Chhowalla, M.; Bianco, A. Enzymatic Biodegradability of Pristine and Functionalized Transition Metal Dichalcogenide MoS <sub>2</sub> Nanosheets. <i>Advanced Functional Materials</i> <b>2017</b> , 27 (7), 1605176. <a href="https://doi.org/10.1002/adfm.201605176">https://doi.org/10.1002/adfm.201605176</a> . | MoS <sub>2</sub>      |
| 2       | Hao, J.; Song, G.; Liu, T.; Yi, X.; Yang, K.; Cheng, L.; Liu, Z. In Vivo Long-Term Biodistribution, Excretion, and Toxicology of PEGylated Transition-Metal Dichalcogenides MS <sub>2</sub> (M = Mo, W, Ti) Nanosheets. <i>Adv Sci (Weinh)</i> <b>2016</b> , 4 (1), 1600160. <a href="https://doi.org/10.1002/advs.201600160">https://doi.org/10.1002/advs.201600160</a> .                              | MoS <sub>2</sub> /PEG |

**Table S6.** References for Figure S8.

| Ref No. | Reference                                                                                                                                                                                                                                                                                                                                                               |
|---------|-------------------------------------------------------------------------------------------------------------------------------------------------------------------------------------------------------------------------------------------------------------------------------------------------------------------------------------------------------------------------|
| 1       | Kim, H.; Jo, G.; Chang, J. H. Ultrasound-Assisted Photothermal Therapy and Real-Time Treatment Monitoring. <i>Biomed Opt Express</i> <b>2018</b> , 9 (9), 4472–4480. <a href="https://doi.org/10.1364/BOE.9.004472">https://doi.org/10.1364/BOE.9.004472</a> .                                                                                                          |
| 2       | Mittelstein, D. R.; Ye, J.; Schibber, E. F.; Roychoudhury, A.; Martinez, L. T.; Fekrazad, M. H.; Ortiz, M.; Lee, P. P.; Shapiro, M. G.; Gharib, M. Selective Ablation of Cancer Cells with Low Intensity Pulsed Ultrasound. <i>Appl. Phys. Lett.</i> <b>2020</b> , 116 (1), 013701. <a href="https://doi.org/10.1063/1.5128627">https://doi.org/10.1063/1.5128627</a> . |

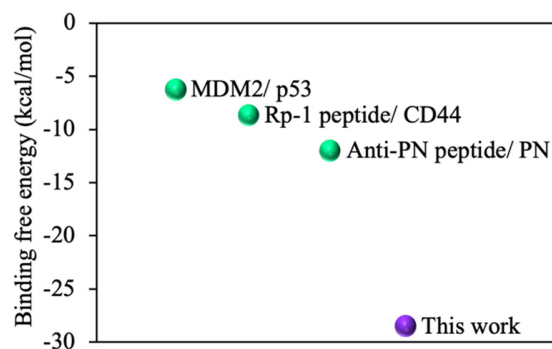

**Figure S1.** Comparison of the averaged computed binding-free energy of the G3P–PD-L1 complex with that of current peptide-cancer cell protein models. The information of the references can be found in Table S3.

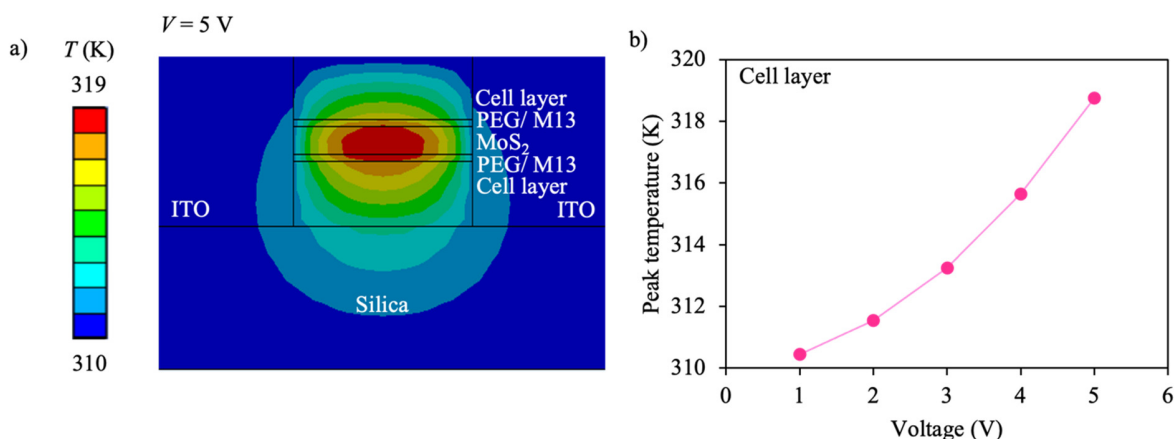

**Figure S2.** a) Thermal distribution of the cell-layer/ nanostructure model. The MoS<sub>2</sub> and PEG/ M13 was inserted in the middle of the cell layer, and a square-based electrical stimulus was applied. b) Variation of the peak temperature in the cell layer for different stimulus amplitudes.

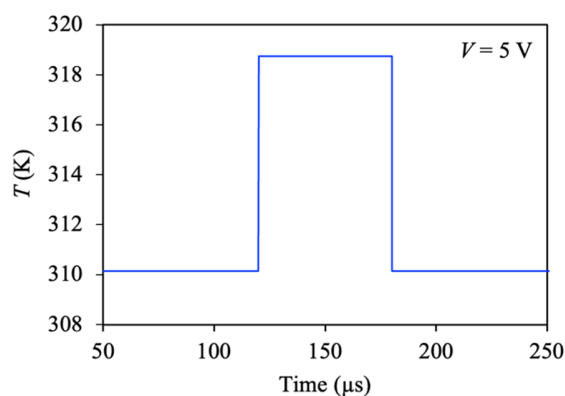

**Figure S3.** Thermal profile of the cell layer upon the application of 5-V stimulus.

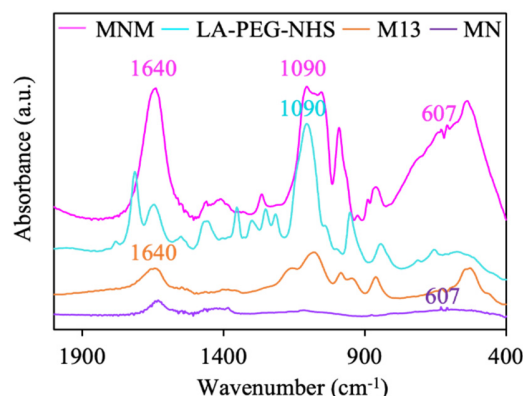

**Figure S4.** Fourier transform infrared (FTIR) spectra of the MNM, LA-PEG-NHS, M13 and MN.

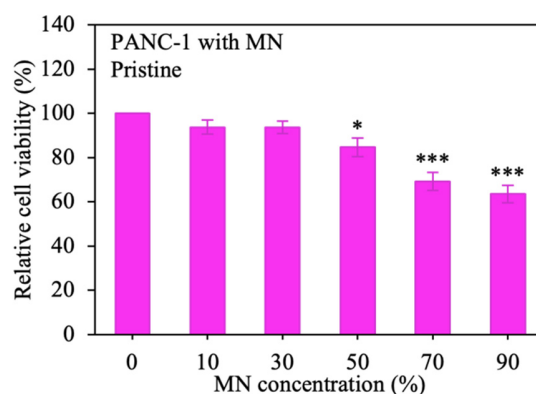

**Figure S5.** Variation of the relative cell viability of PANC-1 cells with MN for different MN concentrations.

Cell viability plots with a decreased behavior for the material concentration above a specified value have been shown in both the cells with 2D-based materials only and the cells with 2D-based materials and with the use of the PEG/ targeting agent harnessed by other research groups [1,2]. Our results are similar since a similar set of plots were attained for the cells with MN only/ MNM utilized in this work.

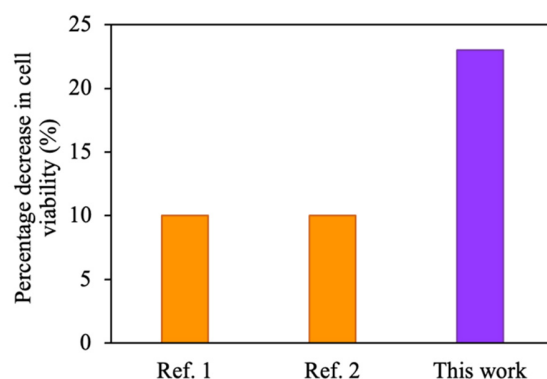

**Figure S6.** Comparison of the percentage decrease in the cell viability of integrated MNM cancer cell AC-stimulus systems with that of existing thermal-based therapy platforms. The information of the references can be found in Table S4.

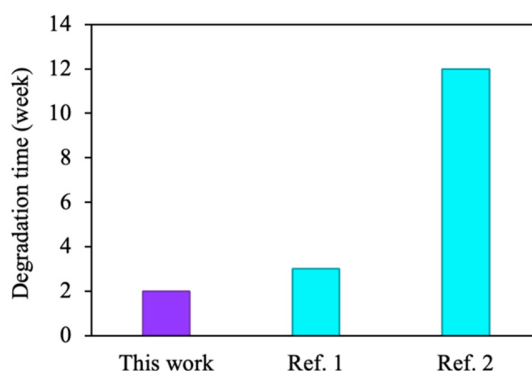

**Figure S7.** Comparison of the degradation time of the MNM with that of state-of-the-art MoS<sub>2</sub>-based systems in physiological media. The information of the references can be found in Table S5.

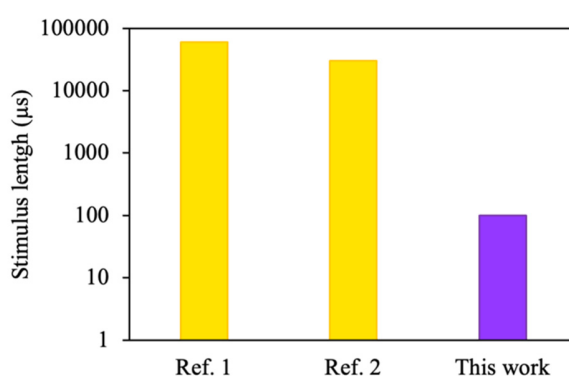

**Figure S8.** Comparison of the stimulus length of the combined MNM AC-stimulus cancer cell platform with that of current thermal-type therapy systems. The information of the references can be found in Table S6.

## Reference

1. Hu, K.; Xie, L.; Zhang, Y.; Hanyu, M.; Yang, Z.; Nagatsu, K.; Suzuki, H.; Ouyang, J.; Ji, X.; Wei, J.; et al. Marriage of Black Phosphorus and Cu<sup>2+</sup> as Effective Photothermal Agents for PET-Guided Combination Cancer Therapy. *Nat Commun* **2020**, *11*, 2778, doi:10.1038/s41467-020-16513-0.
2. Lu, H.; Xu, Y.; Qiao, R.; Lu, Z.; Wang, P.; Zhang, X.; Chen, A.; Zou, L.; Wang, Z. A Novel Clustered SPIO Nanoplatform with Enhanced Magnetic Resonance T2 Relaxation Rate for Micro-Tumor Detection and Photothermal Synergistic Therapy. *Nano Res.* **2020**, *13*, 2216–2225, doi:10.1007/s12274-020-2839-0.
